# Supplementary material
Source: publisher figshare collection journal article supplement (https://frontiersin.figshare.com/ndownloader/files/28168233)
Supplement: Supplementary file [file 28168233]

# **Augmented Respiratory-Sympathetic Coupling and Hemodynamic Response To Acute Mild Hypoxia in Female Rodents With Chronic Kidney Disease**

## **SUPPLEMENTARY MATERIAL**

**Manash Saha <sup>1,2,3</sup>, Qi-Jian Sun <sup>1</sup>, Cara M. Hildreth<sup>1</sup>, Peter G.R. Burke<sup>1,4</sup> and  
Jacqueline K Phillips <sup>1\*</sup>**

*<sup>1</sup> Department of Biomedical Sciences, Macquarie University, Sydney NSW, Australia*

*<sup>2</sup> Department of Nephrology, National Institute of Kidney Disease and Urology, Dhaka, Bangladesh*

*<sup>3</sup> Graduate School of Medicine, Wollongong University, Wollongong, NSW, Australia*

*<sup>4</sup> Neuroscience Research Australia, Sydney NSW, Australia*

**\* Correspondence**

*Jacqueline K Phillips*

[jacqueline.phillips@mq.edu.au](mailto:jacqueline.phillips@mq.edu.au)

**SUPPLEMENTAL TABLE 1** | Renal function parameters in male and female Lewis and Lewis Polycystic Kidney rats.

|                               | Male         |            | Female      |            | P value |        |
|-------------------------------|--------------|------------|-------------|------------|---------|--------|
|                               | LPK          | Lewis      | LPK         | Lewis      | Sex     | Strain |
| n                             | 8            | 10         | 8           | 9          |         |        |
| Urea (mmol/L)                 | 24.3 ± 2.3*  | 5.9 ± 0.3  | 23.7 ± 2.7* | 6.7 ± 0.5  | 0.9259  | <0.001 |
| Creatinine (μmol/L)           | 60.6 ± 11.7* | 22.3 ± 4.6 | 44.7 ± 7.9* | 13.1 ± 2.6 | 0.0869  | <0.001 |
| Creatinine Clearance (mL/min) | 2.08 ± 0.4*  | 10.1 ± 2.3 | 1.5 ± 0.3*  | 7.4 ± 1.2  | 0.2782  | <0.001 |

LPK, Lewis Polycystic Kidney; # Significantly different between male vs. female animals within same strain ( $P < 0.05$ ), \* Significantly different between the strains in same sex ( $P < 0.05$ ) as determined using two-way ordinary ANOVA followed by Bonferroni's post-hoc correction. n = number of animals per group. Data for male animals is republished with permission of Elsevier from Saha, M. et al (2019). Respiratory sympathetic modulation is augmented in chronic kidney disease. *Respir. Physiol. Neurobiol.* 262, 57-66; permission conveyed through Copyright Clearance Center, Inc.

**SUPPLEMENTAL TABLE 2** | Effect of peripheral chemoreceptor stimulation on cardiovascular and ventilatory responses in male and female Lewis and Lewis Polycystic Kidney rats

|                              | Male        |             | Female       |             | P value |        |
|------------------------------|-------------|-------------|--------------|-------------|---------|--------|
|                              | LPK (8)     | Lewis (9)   | LPK (8)      | Lewis (9)   | Sex     | Strain |
| Δ MAP (mmHg)                 | 21 ± 5      | 4 ± 4       | 30 ± 6       | 12 ± 6      | 0.146   | 0.002  |
| Δ SBP (mmHg)                 | 34 ± 11     | 5 ± 5       | 41 ± 8       | 15 ± 6      | 0.308   | 0.001  |
| Δ DBP (mmHg)                 | 16 ± 4      | 4 ± 4       | 27 ± 6       | 9 ± 5       | 0.135   | 0.007  |
| Δ PP (mmHg)                  | 18 ± 7      | 1 ± 2       | 15 ± 5       | 5 ± 1       | 0.9564  | 0.004  |
| Δ HR (bpm)                   | 11 ± 1      | 12 ± 2 #    | 23 ± 3       | 25 ± 6      | 0.001   | 0.832  |
| Δ PNA amplitude (μV)         | 9.8 ± 3.9   | 10.9 ± 3.6  | 11.01 ± 1.9  | 7.3 ± 1.7   | 0.682   | 0.657  |
| Δ PNA duration (sec)         | 0.07 ± 0.01 | 0.13 ± 0.02 | -0.07 ± 0.03 | -0.2 ± 0.03 | 0.095   | 0.053  |
| Δ PNA frequency (cycles/min) | -2 ± 2      | 5 ± 2       | -10 ± 3      | 5 ± 2 *     | 0.061   | <0.001 |

Delta change in phrenic nerve activity (PNA) and blood pressure (mmHg) under hypoxic or hypercapnic conditions in adult Lewis and Lewis Polycystic Kidney (LPK) rats. MAP: mean arterial pressure, SBP: systolic blood pressure, DBP: diastolic blood pressure, PP: pulse pressure; HR: heart rate. Δ = Delta change in, LPK, Lewis Polycystic Kidney; # Significantly different between male vs. female animals within same strain, \* Significantly different between the strains in same sex ( $P < 0.05$ ) as determined using two-way ordinary ANOVA followed by Bonferroni's *post-hoc* correction.  $n$  = number of animals per group. There was significant interaction in only Δ PNA duration ( $P < 0.05$ ) between the variables. Data for male animals is republished with permission of Elsevier from Saha, M. et al (2019). Respiratory sympathetic modulation is augmented in chronic kidney disease. *Respir. Physiol. Neurobiol.* 262, 57-66; permission conveyed through Copyright Clearance Center, Inc.

**SUPPLEMENTAL TABLE 3** | Effect of central chemoreceptor stimulation on cardiovascular and ventilatory responses in male and female Lewis and Lewis Polycystic Kidney rats.

|                                     | Male            |                  | Female           |                 | P value |        |
|-------------------------------------|-----------------|------------------|------------------|-----------------|---------|--------|
|                                     | LPK (8)         | Lewis (9)        | LPK (8)          | Lewis (9)       | Sex     | Strain |
| $\Delta$ MAP (mmHg)                 | 16 $\pm$ 4      | 19 $\pm$ 3       | 13 $\pm$ 3       | 9 $\pm$ 5       | 0.123   | 0.878  |
| $\Delta$ SBP (mmHg)                 | 29 $\pm$ 8      | 22 $\pm$ 4       | 20 $\pm$ 5       | 12 $\pm$ 6      | 0.098   | 0.237  |
| $\Delta$ DBP (mmHg)                 | 13 $\pm$ 3      | 18 $\pm$ 3       | 10 $\pm$ 2       | 8 $\pm$ 4       | 0.074   | 0.643  |
| $\Delta$ PP (mmHg)                  | 16 $\pm$ 6      | 4 $\pm$ 2        | 10 $\pm$ 3       | 3 $\pm$ 2       | 0.352   | 0.026  |
| $\Delta$ HR (bpm)                   | -4 $\pm$ 1      | -8 $\pm$ 1       | 2 $\pm$ 3        | -0.3 $\pm$ 1    | 0.002   | 0.180  |
| $\Delta$ PNA amplitude ( $\mu$ V)   | 9.1 $\pm$ 1.6   | 8.7 $\pm$ 2.7    | 9 $\pm$ 2.3      | 9.4 $\pm$ 2.8   | 0.919   | 0.992  |
| $\Delta$ PNA duration (sec)         | 0.11 $\pm$ 0.02 | 0.15 $\pm$ 0.02# | -0.06 $\pm$ 0.02 | 0.8 $\pm$ 0.03* | <0.001  | <0.001 |
| $\Delta$ PNA frequency (cycles/min) | -4 $\pm$ 1      | -3 $\pm$ 1       | -2 $\pm$ 1       | -0.2 $\pm$ 1    | 0.101   | 0.365  |

Delta change in phrenic nerve activity (PNA) and blood pressure (mmHg) under hypoxic or hypercapnic conditions in adult Lewis and Lewis Polycystic Kidney (LPK) rats. MAP: mean arterial pressure, SBP: systolic blood pressure, DBP: diastolic blood pressure, PP: pulse pressure; HR: heart rate.  $\Delta$  = Delta change in, LPK, Lewis Polycystic Kidney; # Significantly different between male vs. female animals within same strain ( $P < 0.05$ ), \* Significantly different between the strains in same sex ( $P < 0.05$ ) as determined using two-way ordinary ANOVA followed by Bonferroni's *post-hoc* correction.  $n$  = number of animals per group. There was significant interaction in only  $\Delta$  PNA duration ( $P < 0.05$ ) between the variables. Data for male animals is republished with permission of Elsevier from Saha, M. et al (2019). Respiratory sympathetic modulation is augmented in chronic kidney disease. *Respir. Physiol. Neurobiol.* 262, 57-66; permission conveyed through Copyright Clearance Center, Inc.

**SUPPLEMENTAL TABLE 4** | Effect of peripheral chemoreceptor stimulation on respiratory sympathetic coupling in male and female Lewis and Lewis Polycystic Kidney rats.

|          | Male        |              | Female      |             | P value |        |
|----------|-------------|--------------|-------------|-------------|---------|--------|
|          | LPK         | Lewis        | LPK         | Lewis       | Sex     | Strain |
| sSNA (n) | 8           | 9            | 8           | 9           |         |        |
| AUC      | 5.6 ± 2.1   | 1.8 ± 0.6    | 8.9 ± 3.4   | 2.0 ± 0.7   | 0.257   | 0.005  |
| PA       | 3.9 ± 0.9   | 1.9 ± 0.6    | 5.5 ± 2.3   | 1.8 ± 0.6   | 0.540   | 0.028  |
| Duration | 0.07 ± 0.07 | -0.19 ± 0.1  | 0.21 ± 0.09 | 0.12 ± 0.07 | 0.019   | 0.067  |
| rSNA (n) | 5           | 6            | 5           | 6           |         |        |
| AUC      | 7.5 ± 2.1   | 3.0 ± 0.8    | 6.1 ± 1.2   | 3.1 ± 0.7   | 0.592   | 0.006  |
| PA       | 4.9 ± 1.2   | 5.2 ± 1.2    | 4.9 ± 1.2   | 3.7 ± 0.9   | 0.562   | 0.667  |
| Duration | 0.13 ± 0.07 | -0.09 ± 0.07 | 0.09 ± 0.1  | 0.01 ± 0.06 | 0.689   | 0.098  |

sSNA, splanchnic sympathetic nerve activity; rSNA, renal sympathetic nerve activity; AUC, area under curve; PA, peak amplitude; LPK, Lewis Polycystic Kidney; # Significantly different between male vs. female animals within same strain ( $P < 0.05$ ), \* Significantly different between the strains in same sex ( $P < 0.05$ ) as determined using two-way ordinary ANOVA followed by Bonferroni's post-hoc correction. n = number of animals per group. Male animals are the same cohort as reported in Saha, M. et al (2019). Respiratory sympathetic modulation is augmented in chronic kidney disease. Respir. Physiol. Neurobiol. 262, 57-66.

**SUPPLEMENTAL TABLE 5** | Effect of central chemoreceptor stimulation on respiratory sympathetic coupling in male and female Lewis and Lewis Polycystic Kidney rats.

|          | Male         |              | Female     |              | P value |        |
|----------|--------------|--------------|------------|--------------|---------|--------|
|          | LPK          | Lewis        | LPK        | Lewis        | Sex     | Strain |
| sSNA (n) | 8            | 9            | 8          | 9            |         |        |
| AUC      | 2.6 ± 0.7    | 1.0 ± 0.4    | 2.5 ± 0.9  | 1.3 ± 0.7    | 0.921   | 0.071  |
| PA       | 2.2 ± 0.5    | 1.6 ± 0.4    | 1.7 ± 0.5  | 2.3 ± 0.7    | 0.830   | 0.994  |
| Duration | 0.03 ± 0.04  | -0.07 ± 0.06 | 0.1 ± 0.07 | -0.09 ± 0.07 | 0.707   | 0.024  |
| rSNA (n) | 5            | 6            | 5          | 6            |         |        |
| AUC      | 2.5 ± 1.4    | 3.2 ± 0.5    | 4.2 ± 0.9  | 3.5 ± 1.4    | 0.360   | 0.974  |
| PA       | 1.6 ± 0.7 *  | 5.7 ± 1.3    | 1.8 ± 0.5  | 3.5 ± 0.8    | 0.308   | 0.005  |
| Duration | -0.02 ± 0.09 | -0.26 ± 0.04 | 0.2 ± 0.07 | 0.01 ± 0.09  | 0.009   | 0.014  |

sSNA, splanchnic sympathetic nerve activity; rSNA, renal sympathetic nerve activity; AUC, area under curve; PA, peak amplitude; LPK, Lewis Polycystic Kidney; # Significantly different between male vs. female animals within same strain ( $P < 0.05$ ), \* Significantly different between the strains in similar sex ( $P < 0.05$ ) as determined using two-way ordinary ANOVA followed by Bonferroni's post-hoc correction. n = number of animals per group. Data from male animals is the same cohort as reported in Saha, M. et al (2019). Respiratory sympathetic modulation is augmented in chronic kidney disease. *Respir. Physiol. Neurobiol.* 262, 57-66.
